# Supplementary material for: Cryptic Genes for Interbacterial Antagonism Distinguish Rickettsia Species Infecting Blacklegged Ticks From Other Rickettsia Pathogens
Source: PubMed Central journal article supplement (PMC9111745; doi:10.3389/fcimb.2022.880813), 2022-05-03
Supplement: DataSheet_2.pdf [file DataSheet_2.pdf]

**B**

*Rickettsia buchneri* REIS\_1424 N- [ ] -C 263

Fig. S1

*Rickettsia*-specific insertion

|              |      |      |     |     |           |     |            |     |                       |      |      |                   |     |      |
|--------------|------|------|-----|-----|-----------|-----|------------|-----|-----------------------|------|------|-------------------|-----|------|
| REIS_1424    | 112  | [38] | KIP | [8] | SEKGTGLLY | [4] | NGVRIMKGRS | [6] | QKVDYAVIVDKGCRIDKYG   | [23] | [14] | HINLEEWIKKWITHNKP | [0] | 263  |
| NF27_IC00050 | 2067 | [29] | KIP | [8] | NREGVGIRI | [7] | SVIRIDKGNP | [6] | QQVDHVRINYNQVIGRDG    | [0]  | [18] | HIPLSEW-LQWKEWNKP | [0] | 2192 |
| Sphch_1491   | 1275 | [38] | RRR | [8] | NRKGVGSRF | [7] | NRVRVDRGKP | [6] | QRPDHVEQRNGVTVDGNG    | [0]  | [14] | HVPLRDW-LR-----   | [2] | 1400 |
| J0H87_08305  | 650  | [10] | KVP | [8] | A-KGEGWRW | [6] | DGVRIMKGDG | [6] | QHVDYVKINTDGKLVGLDG   | [0]  | [14] | HIPLSEW-LTWKEWN-- | [2] | 750  |
| C4J97_0166   | 2557 | [9]  | KFP | [7] | NKKGVGFRW | [7] | NGVRIDKGEF | [6] | QQVDHVI VRSNGRVIGRDG  | [0]  | [14] | HIPLSEW-KKWKWNNSP | [0] | 2658 |
| EDF81_3004   | 454  | [11] | KFP | [8] | NKKGVGFRW | [7] | NGVRIDQGNP | [6] | QQVDHVI VRNNGKVIIGRDG | [0]  | [14] | HIPLSEW-KKWKWNNSP | [0] | 558  |
| EKH77_08965  | 1030 | [7]  | KVP | [9] | NRKGVGVRW | [5] | NGVRIDKGEA | [6] | QQVDHVVINYGGKVIIGRDG  | [0]  | [14] | HIPLEEW-RKWRSWNQP | [0] | 1128 |
| BJ981_004090 | 2803 | [9]  | KIP | [8] | NKKGVGTRW | [7] | SGVRIDKGDG | [6] | QQRDHVI VRDHGKVLGRNG  | [0]  | [14] | HIPFSEW-SKWSQWNKP | [0] | 2904 |

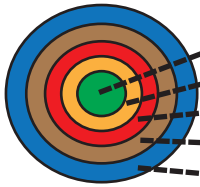

Taxon database

|                                       | NF27_IC00050<br>(as in Fig. 2A) |              |           | REIS_1424<br>(with insertion) |              |           | REIS_1424<br>(w/o insertion) |              |           |
|---------------------------------------|---------------------------------|--------------|-----------|-------------------------------|--------------|-----------|------------------------------|--------------|-----------|
|                                       | Subj.                           | $\bar{x}$ Sm | top 10 Sm | Subj.                         | $\bar{x}$ Sm | top 10 Sm | Subj.                        | $\bar{x}$ Sm | top 10 Sm |
| Rickettsiales                         | 5                               | 4330.26      | na        | 1                             | na           | na        | 1                            | na           | na        |
| Alphaproteobacteria (- Rickettsiales) | 10                              | 2149.50      | 2149.50   | 0                             | na           | na        | 1                            | na           | na        |
| Proteobacteria (- Bacteria)           | 44                              | 3160.01      | 3820.23   | 0                             | na           | na        | 3                            | 950.56       | na        |
| Bacteria (- Proteobacteria)           | 96                              | 3048.58      | 4635.10   | 2                             | na           | na        | 21                           | 1385.68      | 1579.64   |
| - Bacteria                            | 1                               | na           | na        | 0                             | na           | na        | 0                            | na           | na        |

removing the insertion results in greatest similarity to non-proteobacterial proteins
