# Supplementary material for: Cryptic Genes for Interbacterial Antagonism Distinguish Rickettsia Species Infecting Blacklegged Ticks From Other Rickettsia Pathogens
Source: PubMed Central journal article supplement (PMC9111745; doi:10.3389/fcimb.2022.880813), 2022-05-03
Supplement: DataSheet_3.pdf [file DataSheet_3.pdf]

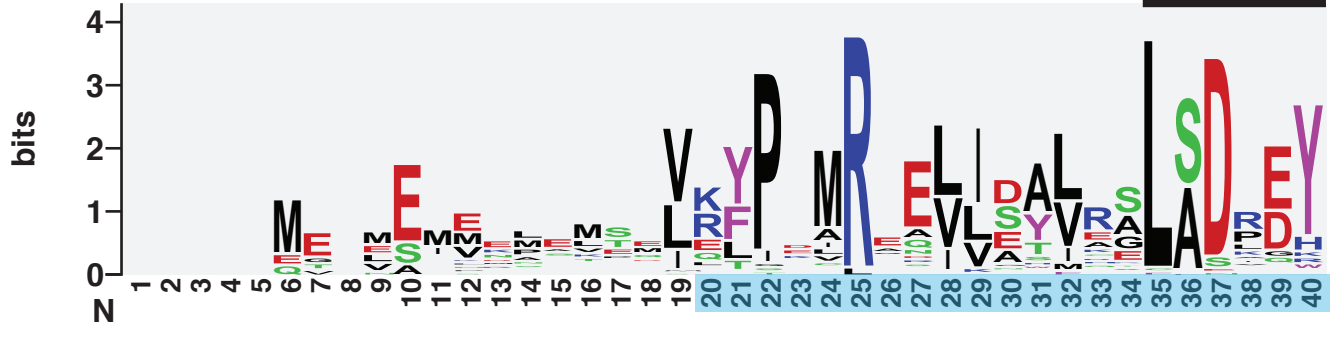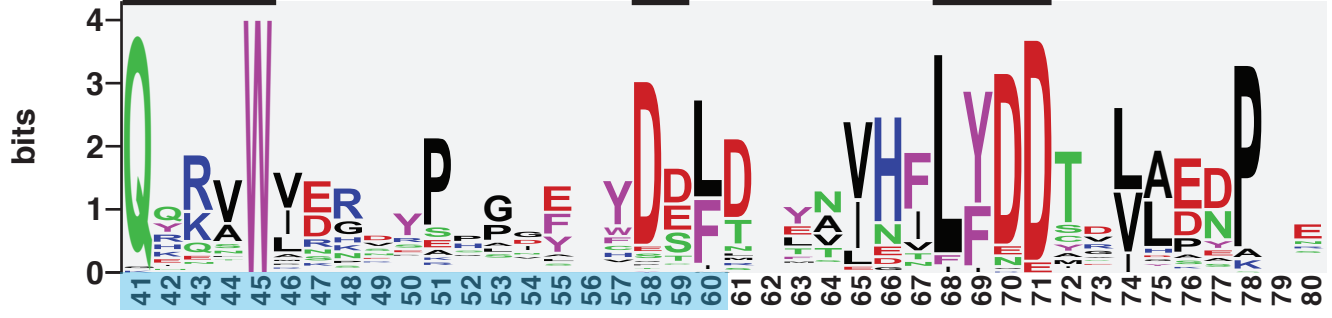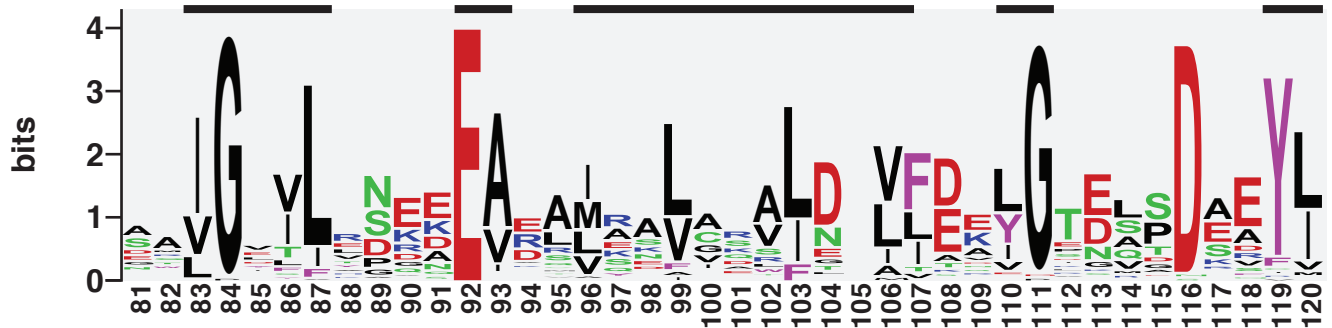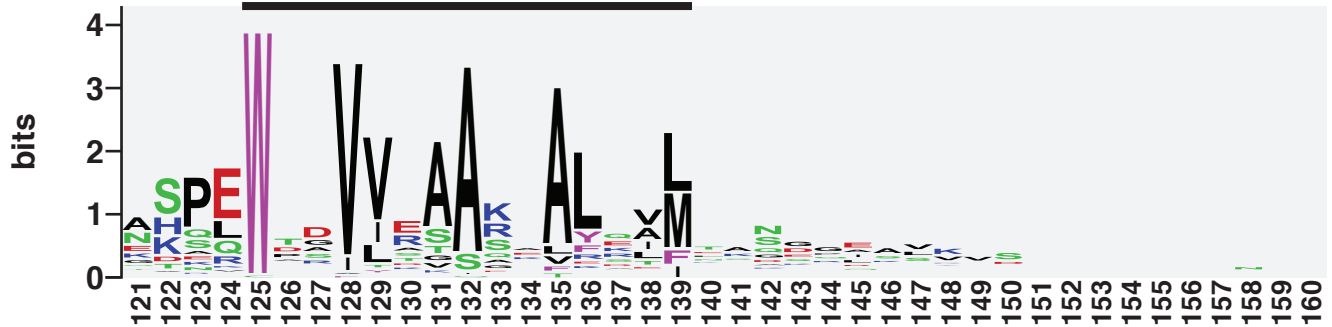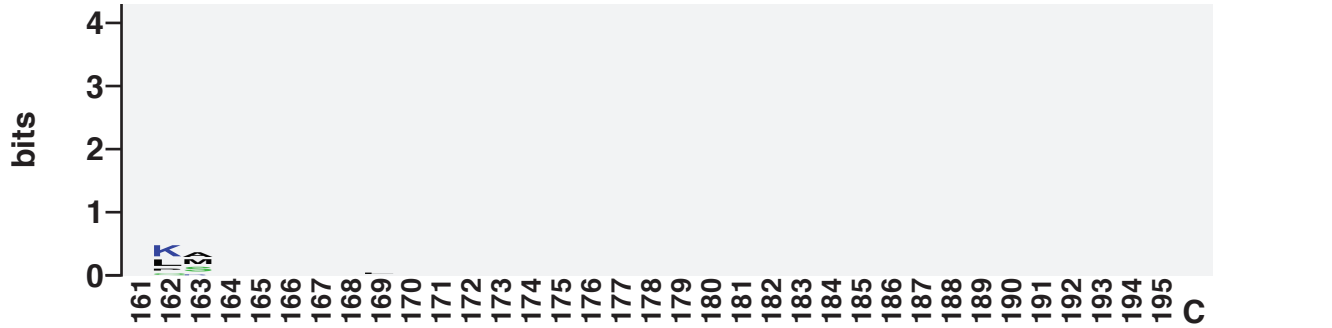

Fig. S2
