# Supplementary material for: Cryptic Genes for Interbacterial Antagonism Distinguish Rickettsia Species Infecting Blacklegged Ticks From Other Rickettsia Pathogens
Source: PubMed Central journal article supplement (PMC9111745; doi:10.3389/fcimb.2022.880813), 2022-05-03

**A**

rCRCT/CRCA-1 is found in a region of recombination adjacent to the SecA gene

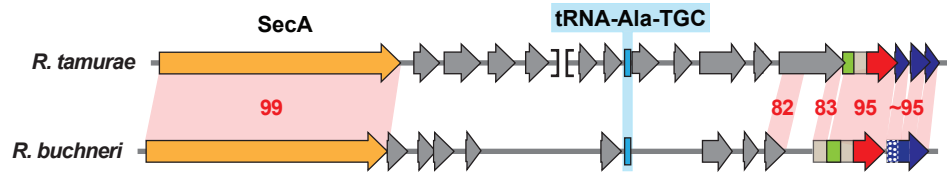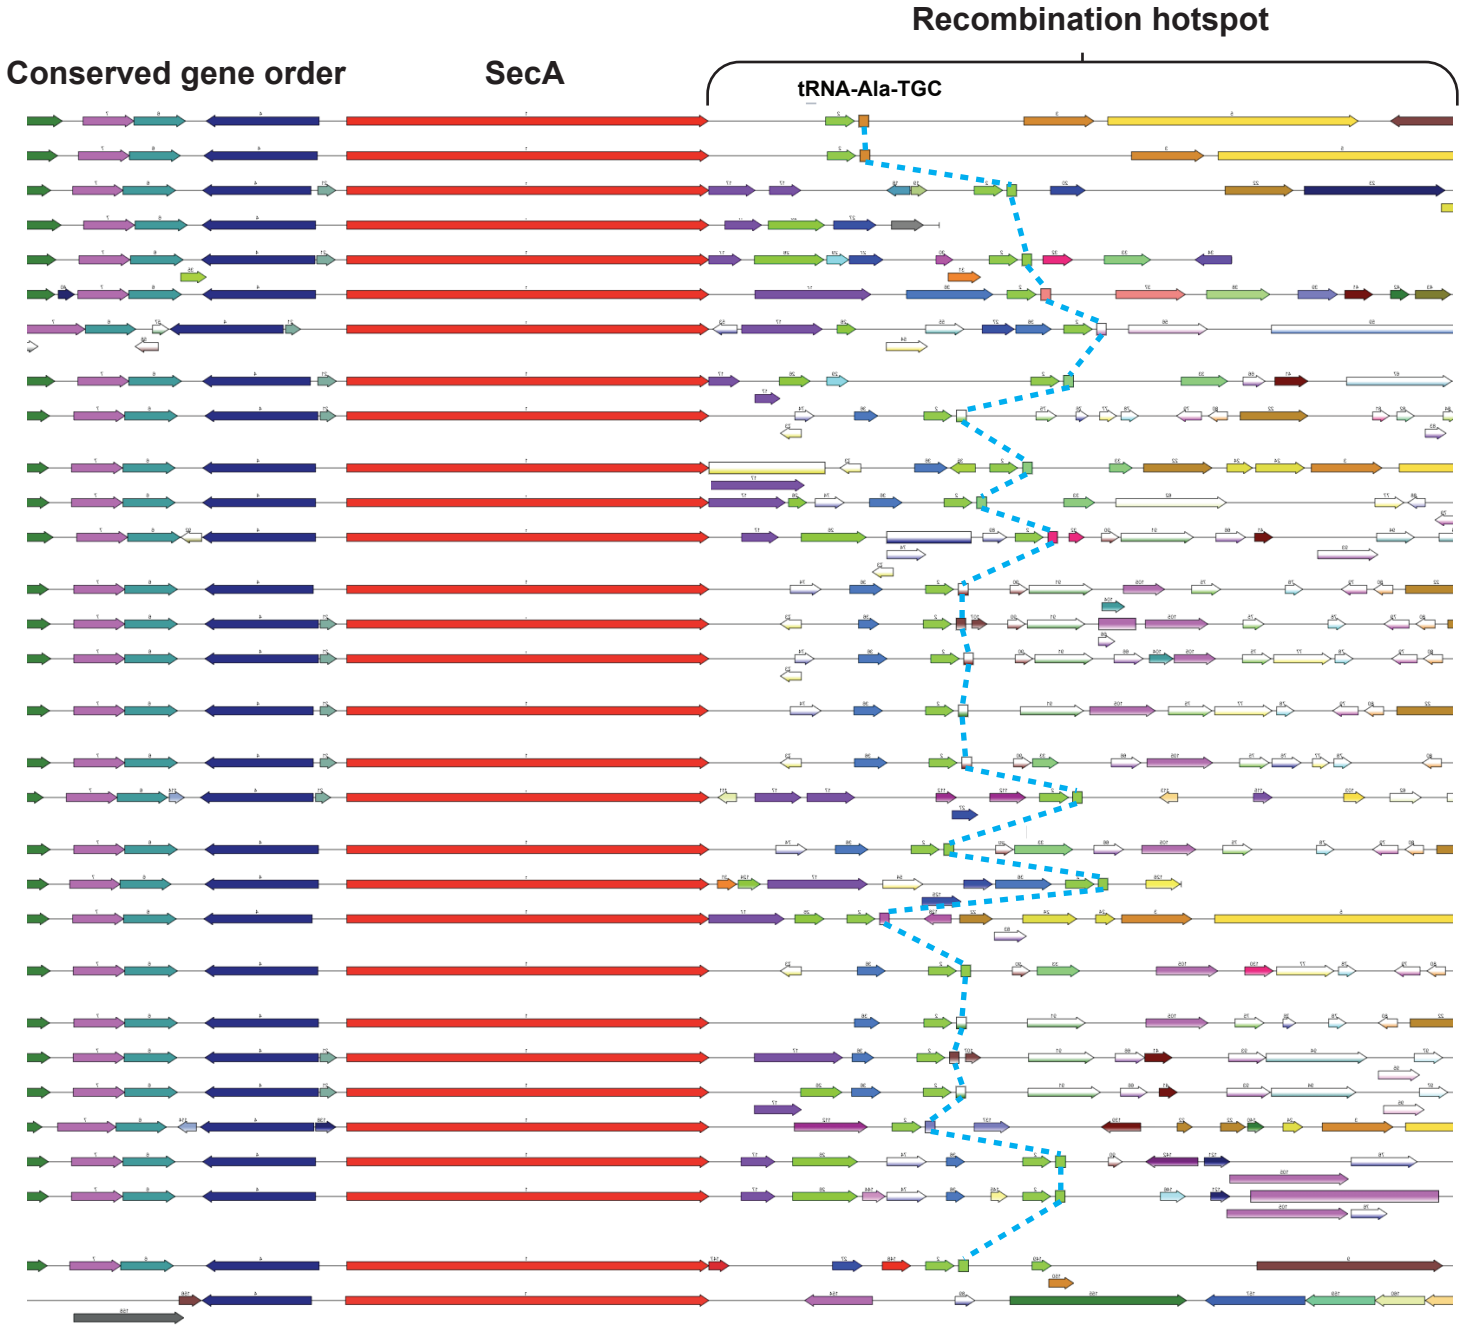

Supplement: DataSheet_4.pdf [file DataSheet_4.pdf]
