# Supplementary material for: Cryptic Genes for Interbacterial Antagonism Distinguish Rickettsia Species Infecting Blacklegged Ticks From Other Rickettsia Pathogens
Source: PubMed Central journal article supplement (PMC9111745; doi:10.3389/fcimb.2022.880813), 2022-05-03

**B**

rCRCT/CRCA-2 is found in a region of recombination adjacent to the BamA gene

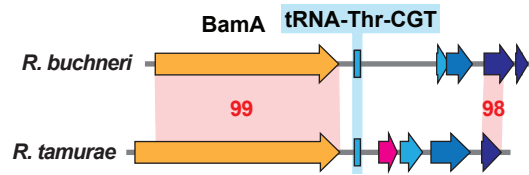

rCRCT/CRCA-3a is also found in this region, indicating multiple insertion of distinct CRCT/CRCA

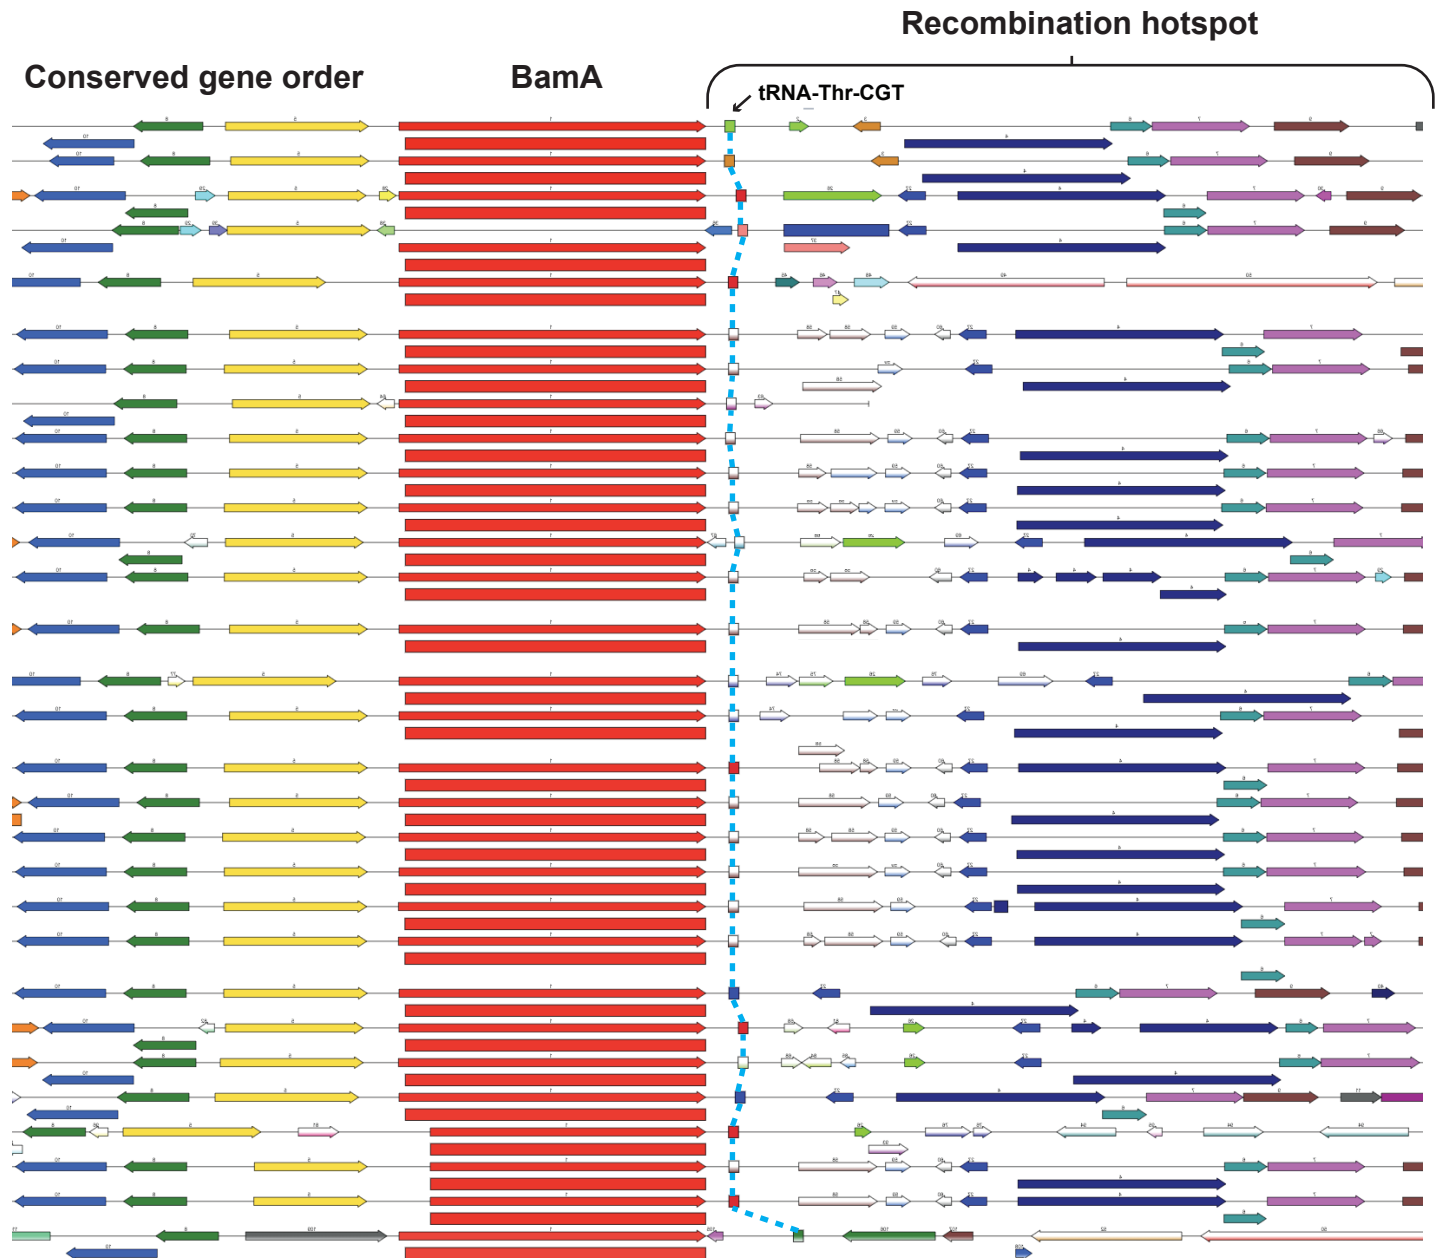

Supplement: DataSheet_5.pdf [file DataSheet_5.pdf]
