# Supplementary material for: Cryptic Genes for Interbacterial Antagonism Distinguish Rickettsia Species Infecting Blacklegged Ticks From Other Rickettsia Pathogens
Source: PubMed Central journal article supplement (PMC9111745; doi:10.3389/fcimb.2022.880813), 2022-05-03

**C**

rCRCT/CRCA-3a is similar to rCRCT/CRCA-3b between subunits I and II of cytochrome c oxidase

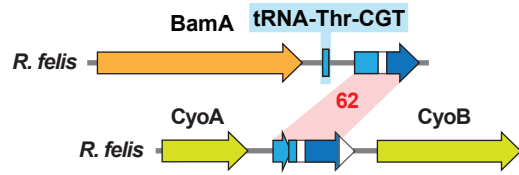

No toxins occur with CRCA-3b and this region has little recombination relative to SecA and BamA

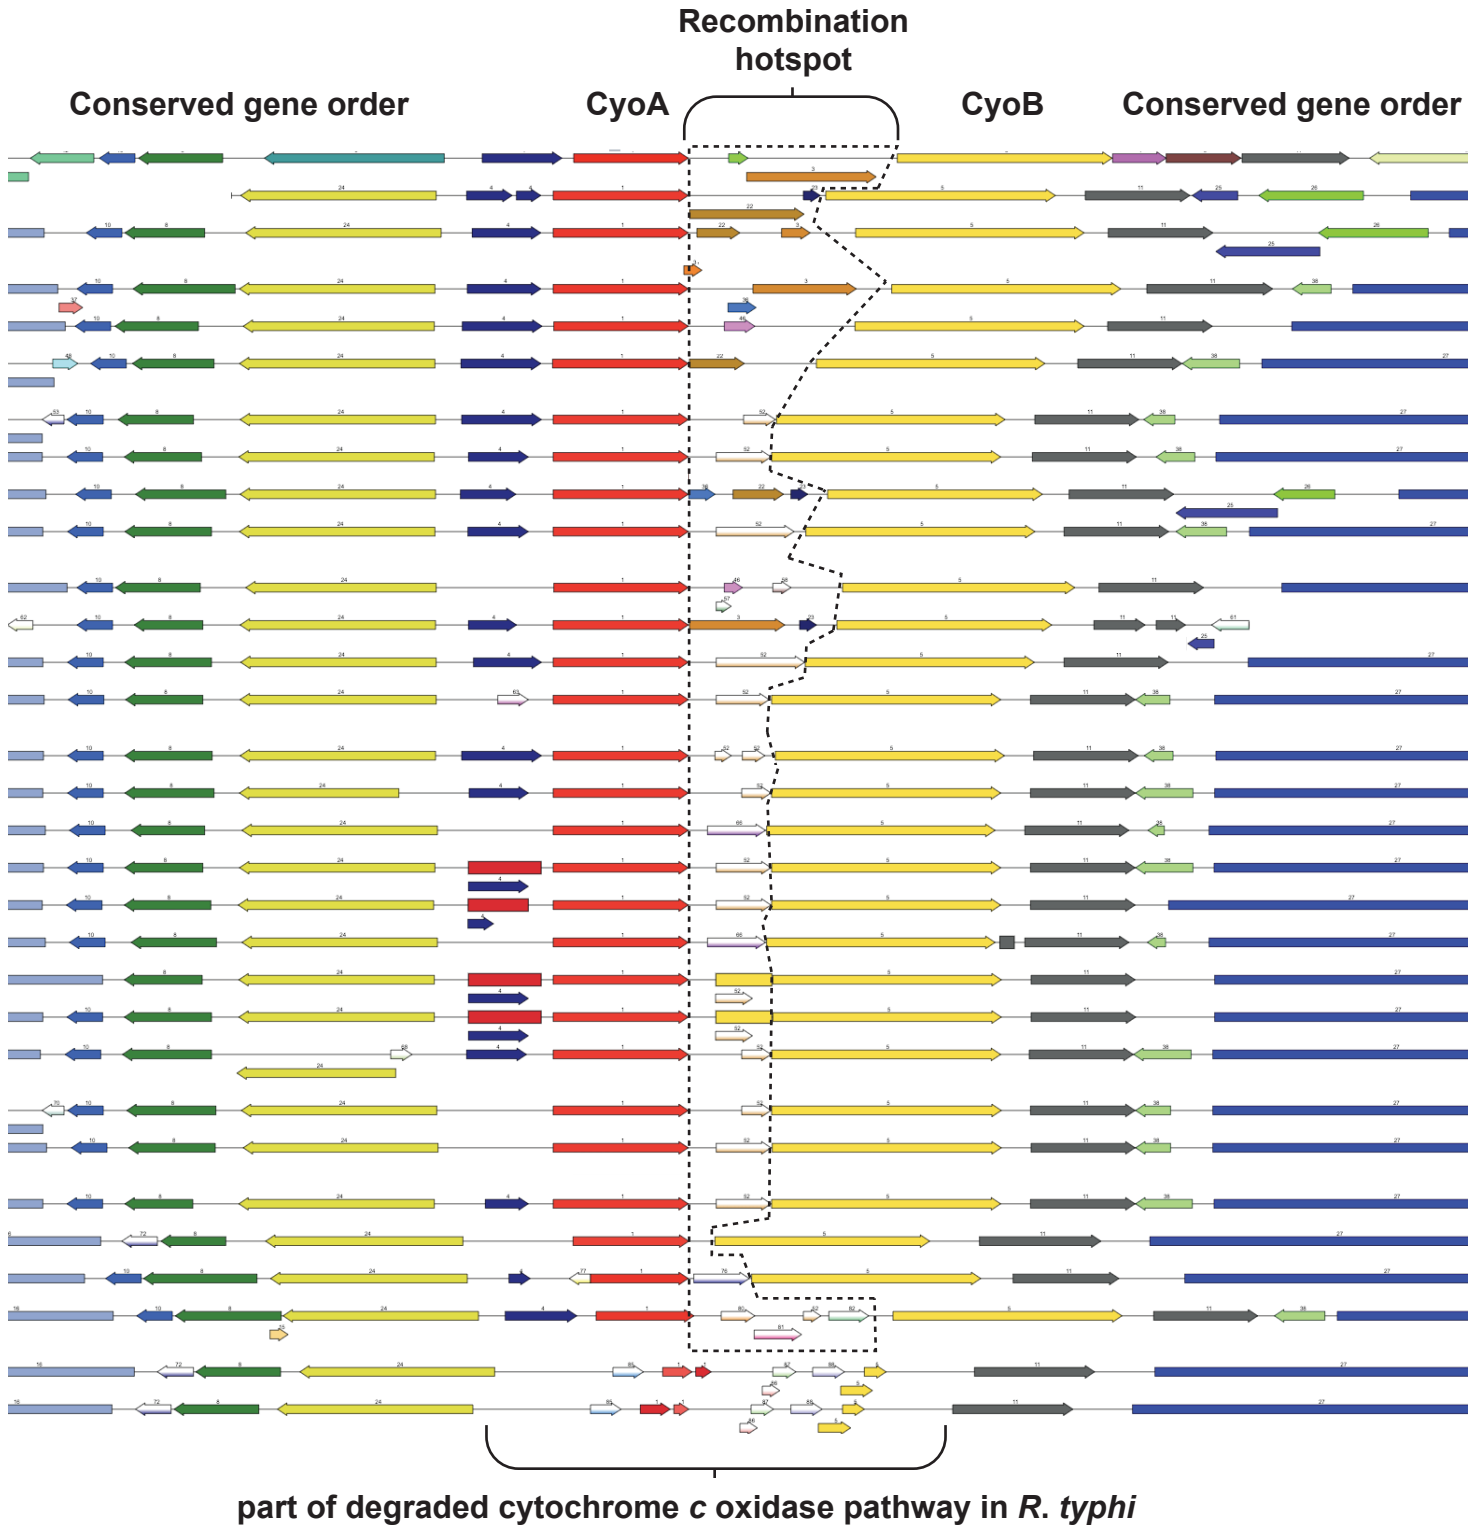

Supplement: DataSheet_6.pdf [file DataSheet_6.pdf]
