# Supplementary material for: Cryptic Genes for Interbacterial Antagonism Distinguish Rickettsia Species Infecting Blacklegged Ticks From Other Rickettsia Pathogens
Source: PubMed Central journal article supplement (PMC9111745; doi:10.3389/fcimb.2022.880813), 2022-05-03
Supplement: DataSheet_7.pdf [file DataSheet_7.pdf]

**A**

|                                      | Max Score                                        | Max Score                                                 | Query Cover | E value  | Per. ident | Acc. Len | Accession      |                |
|--------------------------------------|--------------------------------------------------|-----------------------------------------------------------|-------------|----------|------------|----------|----------------|----------------|
| Hypothetical protein                 | <i>Rickettsia tamurae</i>                        | 169                                                       | 32%         | 6.00E-50 | 100        | 90       | WP_152540701.1 |                |
|                                      | <i>Rickettsia japonica</i>                       | 155                                                       | 30%         | 2.00E-43 | 97.4       | 181      | WP_014120923.1 |                |
|                                      | <i>Rickettsia conorii</i>                        | 154                                                       | 30%         | 9.00E-43 | 96.1       | 181      | WP_014014523.1 |                |
|                                      | <i>Rickettsia argasii</i>                        | 153                                                       | 30%         | 1.00E-42 | 96.1       | 181      | WP_045806003.1 |                |
|                                      | <i>Rickettsia fournieri</i>                      | 152                                                       | 30%         | 4.00E-42 | 96.1       | 181      | WP_103896886.1 |                |
|                                      | <i>Rickettsia slovaca</i>                        | 150                                                       | 30%         | 6.00E-42 | 94.81      | 144      | WP_014419876.1 |                |
|                                      | <i>Rickettsia gravesii</i>                       | 151                                                       | 30%         | 1.00E-41 | 94.81      | 181      | WP_017442373.1 |                |
|                                      | <i>Rickettsia peacockii</i>                      | 148                                                       | 30%         | 6.00E-41 | 93.51      | 144      | WP_085065668.1 |                |
|                                      | <i>Rickettsia</i> sp. Tenjiku01                  | 149                                                       | 30%         | 9.00E-41 | 93.51      | 181      | WP_064429221.1 |                |
|                                      | <i>Rickettsia sibirica</i>                       | 146                                                       | 30%         | 2.00E-40 | 92.21      | 144      | WP_004998075.1 |                |
|                                      | <i>Rickettsia sibirica</i>                       | 146                                                       | 30%         | 3.00E-40 | 92.21      | 144      | WP_016770294.1 |                |
|                                      | <i>Rickettsia philipii</i>                       | 145                                                       | 30%         | 4.00E-40 | 92.21      | 144      | WP_014364856.1 |                |
|                                      | <i>Rickettsia tamurae</i>                        | 137                                                       | 29%         | 1.00E-35 | 92         | 248      | WP_215426163.1 |                |
|                                      | <i>Rickettsia conorii</i> subsp. raoultii        | 100                                                       | 20%         | 3.00E-23 | 94.12      | 81       | AJQ51990.1     |                |
|                                      | <i>Rickettsia conorii</i>                        | 99.8                                                      | 20%         | 9.00E-23 | 92.16      | 92       | WP_014014522.1 |                |
|                                      | <i>Rickettsia argasii</i>                        | 98.6                                                      | 20%         | 2.00E-22 | 92.16      | 92       | WP_045806002.1 |                |
|                                      | <i>Rickettsia honei</i>                          | 95.9                                                      | 20%         | 2.00E-21 | 90.2       | 86       | WP_032850298.1 |                |
|                                      | <i>Rickettsia sibirica</i>                       | 95.9                                                      | 20%         | 2.00E-21 | 90.2       | 92       | WP_004998077.1 |                |
|                                      | <i>Rickettsia sibirica</i>                       | 95.9                                                      | 20%         | 2.00E-21 | 90.2       | 92       | WP_026054999.1 |                |
|                                      | <i>Rickettsia slovaca</i>                        | 95.9                                                      | 20%         | 3.00E-21 | 90.2       | 92       | WP_014419875.1 |                |
|                                      | <i>Rickettsia parkeri</i>                        | 97.4                                                      | 37%         | 4.00E-21 | 92.16      | 158      | QWB86932.1     |                |
|                                      | <i>Rickettsia parkeri</i>                        | 97.4                                                      | 38%         | 4.00E-21 | 92.16      | 157      | WP_012719858.1 |                |
|                                      | <i>Rickettsia parkeri</i>                        | 96.3                                                      | 37%         | 1.00E-20 | 90.2       | 158      | WP_146709252.1 |                |
|                                      | <i>Rickettsia conorii</i>                        | 92.8                                                      | 20%         | 3.00E-20 | 88.24      | 92       | WP_010977480.1 |                |
|                                      | <i>Rickettsia peacockii</i>                      | 92.8                                                      | 20%         | 4.00E-20 | 88.24      | 92       | WP_085065667.1 |                |
|                                      | Endosymbiont of <i>Proechinophthirus fluctus</i> | 91.7                                                      | 38%         | 1.00E-19 | 86.27      | 90       | KYP98281.1     |                |
|                                      | <i>Rickettsia japonica</i> YH                    | 73.6                                                      | 15%         | 5.00E-13 | 87.18      | 82       | BAK96855.1     |                |
|                                      | <i>Rickettsia conorii</i>                        | 72.4                                                      | 16%         | 2.00E-12 | 85.37      | 82       | WP_029374682.1 |                |
|                                      | * <i>Stylophora pistillata</i>                   | 77.8                                                      | 46%         | 4.00E-12 | 42.62      | 2285     | PFX12133.1     |                |
|                                      | Hypothetical protein                             | <i>Rickettsia</i> endosymbiont of <i>Ixodes pacificus</i> | 70.1        | 13%      | 6.00E-12   | 100      | 47             | KJW02813.1     |
|                                      |                                                  | <i>Rickettsia monacensis</i>                              | 65.9        | 13%      | 2.00E-10   | 96.97    | 33             | CEO17499.1     |
|                                      |                                                  | <i>Rickettsia conorii</i>                                 | 65.5        | 22%      | 5.00E-10   | 64.29    | 67             | WP_014014521.1 |
|                                      |                                                  | <i>Rickettsia felis</i>                                   | 65.1        | 13%      | 7.00E-10   | 85.29    | 69             | WP_039594829.1 |
| <i>Rickettsia fournieri</i>          |                                                  | 62.8                                                      | 13%         | 3.00E-09 | 87.88      | 52       | WP_198913008.1 |                |
| <i>Rickettsia japonica</i> YH        |                                                  | 60.5                                                      | 13%         | 2.00E-08 | 84.85      | 44       | BAK96854.1     |                |
| <i>Rickettsia argasii</i>            |                                                  | 60.5                                                      | 13%         | 2.00E-08 | 84.85      | 52       | WP_186786312.1 |                |
| <i>Rickettsia conorii</i>            |                                                  | 59.7                                                      | 13%         | 5.00E-08 | 84.85      | 52       | WP_156860613.1 |                |
| <i>Rickettsia philipii</i> str. 364D |                                                  | 58.5                                                      | 13%         | 9.00E-08 | 87.88      | 33       | AFB26505.1     |                |
| <i>Rickettsia argasii</i> T170-B     |                                                  | 54.3                                                      | 11%         | 4.00E-06 | 83.33      | 41       | KJW03890.1     |                |

\* *Stylophora pistillata* YebQ

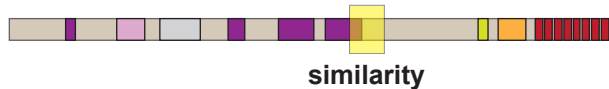

**B**

|         |   |                      |                                                                                   |                                                    |
|---------|---|----------------------|-----------------------------------------------------------------------------------|----------------------------------------------------|
| rCRCA-1 | C | <i>R. buchneri</i>   | -----LTIQCLE--EIKDAFEELADFEKQKQKTPKNSKHPHSYWDSLMFYVLENLYNDCE-----                 | 54                                                 |
|         | S | <i>R. tamurae</i>    | MDYSQOTLKFKINYPMFRMEIKDAFEELADFEKQKQKTPKNSKHPHS-----MFYVLENLYNDCE-----            | 61                                                 |
|         | F | <i>R. tamurae</i>    | -----MWLLSPALRWEIFATFKALANKELQLTKWVDS--KYKHSFWDELFCF-CIDTLFNDANA-----             | 55                                                 |
| rCRCA-2 | S | <i>R. buchneri</i>   | -----MMWLLSPALRWEIFATFKELANKELQLTKWVDS--KYKHSFWNELCF-CIDTLFNDANA-----             | 56                                                 |
|         | C | REIP                 | ----MKHRMMWLLSPALRWEIFATFKELANKELQLTKWVDS--KYKHSFWDELFCF-CIDTLFNDANA-----         | 60                                                 |
|         | S | <i>R. monacensis</i> | -----MMWLLSPALRWEIFATFKELANKELQLTKWVDS--KYKHSFWDELFCF-CIDRLFNDVRQNITMNYAFVLIG     | 69                                                 |
|         |   |                      |                                                                                   | : : ** : * : * : * : * : * : * : * : * : * : * : * |
| rCRCA-1 | C | <i>R. buchneri</i>   | ----LHEYKPENIGELFYNEEEAKQVYEFCKWFNKLNTENIGENQPDAAYLNHPE-----WHRVYSGAKKLF          | 117                                                |
|         | S | <i>R. tamurae</i>    | ----LHEYKPENIGELFYNEEEAKQVYEFCKWFNKLNTENIGENQPDAAYLNHPEICIGF IAVQKSFLNHRVYSGAKKLF | 137                                                |
|         | F | <i>R. tamurae</i>    | ----LDKTSQIKIGLIMYIKKK                                                            | 73                                                 |
| rCRCA-2 | S | <i>R. buchneri</i>   | ----LDKTSQIKIGLTMYNQEEVEKVNKFSHFYDLTEEIEGKPDYRILRSPT-----VAKDYR-----              | 112                                                |
|         | C | REIP                 | ----LDKTSQIKIGLTMYNQEEVEKVNKFSHFYDLTEEIEGKPDIEYGHQPQ-----WQKIIDDATLVE             | 123                                                |
|         | S | <i>R. monacensis</i> | FLMMLDKTSQIKIGLTMYNQEEVEKVNKFSHFYDLTEEIEGKPDIEYGHQPQ-----WQKIIDDATLVE             | 136                                                |
|         |   |                      |                                                                                   | * : . : ** : * : : : : : : * : : * : * : * : * : * |
| rCRCA-1 | C | <i>R. buchneri</i>   | LMDKNKNIILVKSMQF---I I KHNRRKKLME-----KNNLMF                                      | 151                                                |
|         | S | <i>R. tamurae</i>    | LMDKND----KKYNFSEYYAAYNAQWEE-----TYGKK                                            | 167                                                |
|         | F | <i>R. tamurae</i>    |                                                                                   | 73                                                 |
| rCRCA-2 | S | <i>R. buchneri</i>   | -MKQNN----KANDFSECLAQFNQFNIDGYEDYDDFAIAENTKNGYKLR                                 | 156                                                |
|         | C | REIP                 | IMKQNN----KANDFSECLAQFNQFNIDGYEDYDDFAIAENTKNGYKLR                                 | 168                                                |
|         | S | <i>R. monacensis</i> | IMKQNN----KANFSECLAQFNQFNIDGYEDYDDFAIAENTKNGYKLR                                  | 181                                                |
|         |   |                      |                                                                                   | * : * : * : * : * : *                              |

C = Complete  
S = Split (multiple CDS)  
F = Fragment  
M Start site of additional CDS

rCRCA-2 NCBI acc. #s: *R. tamurae* (WP\_032139358); *R. buchneri* (EER22830, EER22831); REIP (KJW03593); *R. monacensis* (CEO17090, CEO17089).
