# Supplementary material for: Cryptic Genes for Interbacterial Antagonism Distinguish Rickettsia Species Infecting Blacklegged Ticks From Other Rickettsia Pathogens
Source: PubMed Central journal article supplement (PMC9111745; doi:10.3389/fcimb.2022.880813), 2022-05-03
Supplement: DataSheet_8.pdf [file DataSheet_8.pdf]

C

|                                                    | Taxon                                              | Max Score                | Query Cover | E value   | %ID   | Acc. Len   | Accession      |
|----------------------------------------------------|----------------------------------------------------|--------------------------|-------------|-----------|-------|------------|----------------|
| rCRCA-3a                                           | <i>Rickettsia helvetica</i> C9P9                   | na                       | na          | na        | na    | 99         | 780_00002939 * |
|                                                    | <i>Rickettsia helvetica</i> C9P9                   | na                       | na          | na        | na    | 154        | 780_00001997 * |
|                                                    | <i>Rickettsia asiatica</i>                         | 77.4                     | 19%         | 3.00E-14  | 65.52 | 68         | BBJ31155.1     |
|                                                    | <i>Rickettsia akari</i>                            | 55.1                     | 15%         | 4.00E-06  | 52.17 | 50         | WP_012013424.1 |
|                                                    | <i>Rickettsia akari</i>                            | 95.5                     | 18%         | 5.00E-21  | 83.33 | 60         | WP_012149527.1 |
|                                                    | <i>Rickettsia australis</i> str. Cutlack           | 52                       | 15%         | 3.00E-05  | 47.83 | 46         | AFC71639.1     |
|                                                    | <i>Rickettsia australis</i> str. Cutlack           | 57.4                     | 14%         | 4.00E-07  | 69.05 | 51         | AFC71642.1     |
|                                                    | <i>Rickettsia hoogstraalii</i> str. RCCE3          | 173                      | 54%         | 1.00E-49  | 58.28 | 179        | KJV81432.1     |
|                                                    | <i>Rickettsia asemonensis</i>                      | 248                      | 79%         | 2.00E-78  | 56.96 | 236        | WP_041078980.1 |
|                                                    | <i>Rickettsia felis</i> URRWXCa12                  | 272                      | 82%         | 9.00E-88  | 58.63 | 245        | AAY61973.1     |
|                                                    | <i>Rickettsia tamurae</i>                          | 154                      | 45%         | 1.00E-42  | 60.74 | 150        | WP_032139359.1 |
|                                                    | <i>Rickettsia tamurae</i>                          | 101                      | 28%         | 6.00E-23  | 58.33 | 84         | WP_032139360.1 |
|                                                    | <i>Rickettsia endosymbiont of Ixodes pacificus</i> | 111                      | 29%         | 2.00E-26  | 65.17 | 113        | WP_197069219.1 |
|                                                    | <i>Rickettsia endosymbiont of Ixodes pacificus</i> | 87.8                     | 24%         | 4.00E-18  | 58.9  | 75         | WP_045804188.1 |
|                                                    | <i>Rickettsia monacensis</i> IrR/Munich            | na                       | na          | na        | na    | 42         | 780_00003822 * |
|                                                    | <i>Rickettsia monacensis</i> IrR/Munich            | 82.4                     | 18%         | 4.00E-16  | 70.91 | 59         | CDI29282.1     |
|                                                    | <i>Rickettsia monacensis</i>                       | 80.9                     | 30%         | 3.00E-15  | 48.89 | 89         | WP_023507580.1 |
|                                                    | <i>Rickettsia buchneri</i>                         | 112                      | 30%         | 3.00E-27  | 64.84 | 99         | WP_008581282.1 |
|                                                    | <i>Rickettsia buchneri</i>                         | 79.3                     | 28%         | 2.00E-14  | 50    | 99         | WP_008581283.1 |
|                                                    | rCRCA-3b                                           | <i>Rickettsia bellii</i> | 602         | 100%      | 0     | 100        | 300            |
| <i>Rickettsia hoogstraalii</i> str. RCCE3          |                                                    | 330                      | 83%         | 4.00E-110 | 68.25 | 263        | KJV80994.1     |
| <i>Rickettsia asemonensis</i>                      |                                                    | 109                      | 40%         | 1.00E-25  | 52.89 | 128        | KIJ89243.1     |
| <i>Rickettsia felis</i> URRWXCa12                  |                                                    | 322                      | 80%         | 2.00E-107 | 70.95 | 239        | AAY61479.1     |
| <i>Rickettsia tamurae</i>                          |                                                    | na                       | na          | na        | na    | 267        | 780_00002380 * |
| <i>Rickettsia endosymbiont of Ixodes pacificus</i> |                                                    | 186                      | 58%         | 1.00E-54  | 55.56 | 175        | WP_197069193.1 |
| <i>Rickettsia monacensis</i> IrR/Munich            |                                                    | 44.7                     | 10%         | 0.012     | 71.88 | 39         | CDI29539.1     |
| <i>Rickettsia monacensis</i> IrR/Munich            |                                                    | 241                      | 73%         | 7.00E-76  | 55.25 | 221        | CDI29540.1     |
| <i>Rickettsia buchneri</i>                         |                                                    | 67.4                     | 18%         | 1.00E-10  | 48.21 | 59         | KDO03272.1     |
| <i>Rickettsia buchneri</i>                         |                                                    | 139                      | 38%         | 3.00E-37  | 59.48 | 117        | KDO03273.1     |
| <i>Rickettsia buchneri</i>                         | 66.2                                               | 17%                      | 6.00E-10    | 66.04     | 74    | KDO03274.1 |                |

D

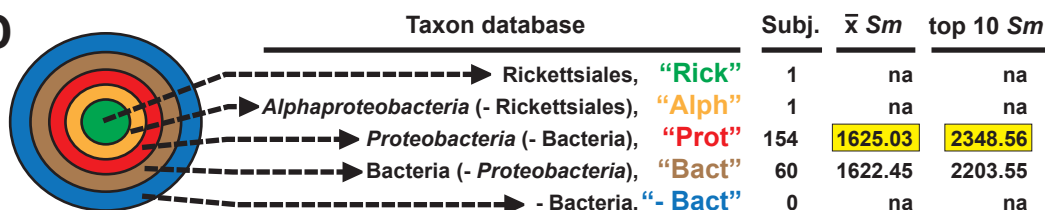

Unlike rCRCT-1, rCRCT-3a is more similar to toxins from *Proteobacteria* than other bacteria

Fig. S4

E

| Annotation [taxon]                                            | Max Score | Query Cover | E value  | %ID   | Acc. Len | Accession      |
|---------------------------------------------------------------|-----------|-------------|----------|-------|----------|----------------|
| Exoprotein, adhesin or hemolysin [ <i>M. bovoculi</i> ]       | 62.4      | 96%         | 7.00E-11 | 40.26 | 103      | AKG19840.1     |
| Hypothetical protein [ <i>M. catarrhalis</i> ]                | 61.2      | 96%         | 2.00E-10 | 41.56 | 103      | WP_003659587.1 |
| Adhesin [ <i>M. catarrhalis</i> ]                             | 61.2      | 96%         | 2.00E-10 | 41.56 | 101      | WP_182997174.1 |
| Hypothetical protein [ <i>M. catarrhalis</i> ]                | 60.8      | 97%         | 2.00E-10 | 38.46 | 97       | WP_064602974.1 |
| Hypothetical protein [ <i>M. catarrhalis</i> ]                | 60.8      | 97%         | 2.00E-10 | 38.46 | 103      | WP_064643002.1 |
| Adhesin [ <i>M. catarrhalis</i> ]                             | 60.8      | 97%         | 2.00E-10 | 38.46 | 103      | WP_120655496.1 |
| Adhesin [ <i>M. catarrhalis</i> ]                             | 60.8      | 97%         | 2.00E-10 | 38.46 | 101      | WP_196758664.1 |
| Hypothetical protein [ <i>M. bovoculi</i> ]                   | 62        | 96%         | 3.00E-10 | 40.26 | 181      | WP_080947368.1 |
| Hypothetical protein [ <i>M. catarrhalis</i> ]                | 59.3      | 97%         | 8.00E-10 | 37.18 | 103      | WP_064622593.1 |
| Hypothetical protein [ <i>M. catarrhalis</i> ]                | 59.3      | 97%         | 1.00E-09 | 37.18 | 103      | WP_064607916.1 |
| Adhesin [ <i>M. catarrhalis</i> ]                             | 58.9      | 96%         | 1.00E-09 | 40.26 | 103      | WP_120655766.1 |
| Hypothetical protein [ <i>M. catarrhalis</i> ]                | 61.2      | 96%         | 1.00E-09 | 41.56 | 230      | MPY09055.1     |
| Adhesin [ <i>M. catarrhalis</i> ]                             | 58.5      | 88%         | 2.00E-09 | 44.12 | 104      | RKM14712.1     |
| Putative hemagglutinin protein [ <i>M. catarrhalis</i> ]      | 59.3      | 97%         | 2.00E-09 | 38.46 | 144      | OAV35577.1     |
| Adhesin [ <i>M. catarrhalis</i> ]                             | 58.2      | 88%         | 2.00E-09 | 44.12 | 97       | WP_183001834.1 |
| S-type pyocin domain protein [ <i>P. fluorescens</i> ]        | 61.6      | 97%         | 2.00E-09 | 34.62 | 413      | WP_150710635.1 |
| Adhesin [ <i>M. catarrhalis</i> ]                             | 57.4      | 97%         | 4.00E-09 | 35.9  | 101      | WP_204281388.1 |
| Hypothetical protein [ <i>M. catarrhalis</i> ]                | 59.7      | 97%         | 5.00E-09 | 38.46 | 218      | WP_081258233.1 |
| S-type pyocin domain protein [sp. Ant30-3]                    | 60.5      | 98%         | 6.00E-09 | 35.53 | 412      | WP_028622128.1 |
| S-type pyocin domain protein [ <i>P. frederiksbergensis</i> ] | 59.3      | 97%         | 1.00E-08 | 37.5  | 415      | WP_076031368.1 |
| Hypothetical protein [ <i>P. farrisi</i> ]                    | 55.5      | 79%         | 2.00E-08 | 39.34 | 76       | WP_225922902.1 |
| Adhesin [ <i>Pseudomonas</i> ]                                | 56.2      | 92%         | 2.00E-08 | 33.8  | 103      | WP_102819864.1 |
| S-type pyocin domain protein [sp. GL-B-26]                    | 58.9      | 97%         | 2.00E-08 | 37.5  | 412      | WP_223430912.1 |
| S-type pyocin domain protein [ <i>P. fluorescens</i> ]        | 58.9      | 97%         | 2.00E-08 | 37.5  | 412      | WP_046048933.1 |
| ★ Crystal structure CDI complex [ <i>C. taiwanensis</i> ]     | 55.1      | 81%         | 2.00E-08 | 31.82 | 76       | 5T87_E         |

■ *Moraxella* ■ *Pseudomonas* ■ *Cupriavidus*

★ Further comparisons shown in Fig. S4F, G
