# Supplementary material for: Cryptic Genes for Interbacterial Antagonism Distinguish Rickettsia Species Infecting Blacklegged Ticks From Other Rickettsia Pathogens
Source: PubMed Central journal article supplement (PMC9111745; doi:10.3389/fcimb.2022.880813), 2022-05-03
Supplement: DataSheet_11.pdf [file DataSheet_11.pdf]

>EER2217.1 hypothetical protein REIS\_1424 [Rickettsia endosymbiont of Ixodes scapularis]  
 MEFISSALKPQQASAFSAGEEELTAKQOEELKROEEERLQEIILDEPGVEPVYPEMLVLSLISAPFRLVKS  
 LYGLFKDQIIDLVSYSYKDKAIKLSREIDNNTIDVSNNTIKLQKHIEDITGVKLDNLELEKYGKYLEEYE  
 IWVQLPEIVKKIPEKLGFPKPFSEKGTGLLYGDKVNGMRIMKGRSNVEFSHQVDYAVIVDKGCRIDKYGN  
 QLRYSNNTKVTVIDPVSNKI I KEIPGFKLKKIPEAHINLEEWIKKWITHNKP

- Ubiquitin associated domain
- VENN motif (manual prediction)
- CRCT (CDI-like/Rhs-like CT toxin)

*Rickettsia buchneri* REIS\_1424 N- [Ubiquitin associated domain] [VENN motif] [CRCT] -C 263

|                                                                                                                                                                                                                                                                                                                                                                                                                                                                                                                                                                                                                                                                                                                                                                                                                                                                                                                                                                                                                                                                                                                                                                                   |                                                                                                                                                                                                                                                                                                                                                                                                                                                                                                                                                                                                                                                                                                                                                                                                                                                                                                                                                                                                                                                                                                                                                                                                                                                                                                                                                                                                                                                                                                                                                                                                                                                                                                                                                                                                                                                                                                                                                                                                                                                                                                                                                                                                                                                                                                                                                                                                                                                                                                                                                                                                                                                                                                                                                                                                                                                                                                                                                                                                                                                                                                                                                                                                                                                                                                                                                                                                                                                                                                                                                                                                                                                                                                                                                                                                                                                                                                                                                                                                                                                                                                                                                                                                                                                                                                                                                                                                                                                                                                                                                                                                                                                                                                       |                                                                                                                                                                                                                                                                                                                                                                                                                                                                                                                                                                                                                                                                                                                                                                                                                                                                                                                                                                                                                                                                                                                                                                                                                                                                                                                                                                                                                                                                                                                                                                                                                                                                                                                                                                                                                                                                                                                                                                                                                                                                                                                                                                                                                                                                                                        |
|-----------------------------------------------------------------------------------------------------------------------------------------------------------------------------------------------------------------------------------------------------------------------------------------------------------------------------------------------------------------------------------------------------------------------------------------------------------------------------------------------------------------------------------------------------------------------------------------------------------------------------------------------------------------------------------------------------------------------------------------------------------------------------------------------------------------------------------------------------------------------------------------------------------------------------------------------------------------------------------------------------------------------------------------------------------------------------------------------------------------------------------------------------------------------------------|-------------------------------------------------------------------------------------------------------------------------------------------------------------------------------------------------------------------------------------------------------------------------------------------------------------------------------------------------------------------------------------------------------------------------------------------------------------------------------------------------------------------------------------------------------------------------------------------------------------------------------------------------------------------------------------------------------------------------------------------------------------------------------------------------------------------------------------------------------------------------------------------------------------------------------------------------------------------------------------------------------------------------------------------------------------------------------------------------------------------------------------------------------------------------------------------------------------------------------------------------------------------------------------------------------------------------------------------------------------------------------------------------------------------------------------------------------------------------------------------------------------------------------------------------------------------------------------------------------------------------------------------------------------------------------------------------------------------------------------------------------------------------------------------------------------------------------------------------------------------------------------------------------------------------------------------------------------------------------------------------------------------------------------------------------------------------------------------------------------------------------------------------------------------------------------------------------------------------------------------------------------------------------------------------------------------------------------------------------------------------------------------------------------------------------------------------------------------------------------------------------------------------------------------------------------------------------------------------------------------------------------------------------------------------------------------------------------------------------------------------------------------------------------------------------------------------------------------------------------------------------------------------------------------------------------------------------------------------------------------------------------------------------------------------------------------------------------------------------------------------------------------------------------------------------------------------------------------------------------------------------------------------------------------------------------------------------------------------------------------------------------------------------------------------------------------------------------------------------------------------------------------------------------------------------------------------------------------------------------------------------------------------------------------------------------------------------------------------------------------------------------------------------------------------------------------------------------------------------------------------------------------------------------------------------------------------------------------------------------------------------------------------------------------------------------------------------------------------------------------------------------------------------------------------------------------------------------------------------------------------------------------------------------------------------------------------------------------------------------------------------------------------------------------------------------------------------------------------------------------------------------------------------------------------------------------------------------------------------------------------------------------------------------------------------------------------------|--------------------------------------------------------------------------------------------------------------------------------------------------------------------------------------------------------------------------------------------------------------------------------------------------------------------------------------------------------------------------------------------------------------------------------------------------------------------------------------------------------------------------------------------------------------------------------------------------------------------------------------------------------------------------------------------------------------------------------------------------------------------------------------------------------------------------------------------------------------------------------------------------------------------------------------------------------------------------------------------------------------------------------------------------------------------------------------------------------------------------------------------------------------------------------------------------------------------------------------------------------------------------------------------------------------------------------------------------------------------------------------------------------------------------------------------------------------------------------------------------------------------------------------------------------------------------------------------------------------------------------------------------------------------------------------------------------------------------------------------------------------------------------------------------------------------------------------------------------------------------------------------------------------------------------------------------------------------------------------------------------------------------------------------------------------------------------------------------------------------------------------------------------------------------------------------------------------------------------------------------------------------------------------------------------|
| <p>REIS_1424<br/>         YBE7_YEAST_1<br/>         HSU75362-1<br/>         UBPC_YEAST_1<br/>         UPBA_DICDI<br/>         RNMARK1_1<br/>         UBPC_YEAST_2<br/>         DMUBCD4_1_1<br/>         HSDKG24_1<br/>         CET12G3_4_1<br/>         KP78_HUMAN_1<br/>         OSU63530-1<br/>         CBL_MOUSE_1<br/>         MMU27462+1_3<br/>         UBC1_BOVIN_1<br/>         MMU27462_1_1<br/>         RA23_YEAST_1<br/>         HSNADGLCT_1<br/>         HS467511_1<br/>         HUMHR23A_1_1<br/>         ATHAKIN10A_1_1<br/>         HSSTPKEMK_1<br/>         CEUT27A3_6<br/>         STSNF1PKN_1<br/>         CEU22183_1<br/>         ATTS1169_1_1<br/>         HSU75362_1<br/>         T24B8_7<br/>         YAUG_SCHPO<br/>         YSCL9931_9_1<br/>         CEF15C11_2<br/>         CEZK20_5<br/>         HS2671010_1<br/>         SC130KBXV_53_1<br/>         YEX3_YEAST_1<br/>         GTS1_YEAST<br/>         CELC06E2_2_1<br/>         HUMORF_1_1<br/>         OSU63530_1<br/>         MMU27462-1_2<br/>         CEF49C12_8<br/>         SPAC3F10_13_1<br/>         UPBA-DICDI<br/>         RF2P_DROME<br/>         YD28_SCHPO<br/>         HUMHR23A-1_2</p> | <p>E E E R L Q E I I L D E P G V E P V Y P E M L V L S L I S A P F R L V K S<br/>         M . . G F T E E . . E A H N A L E K C N W D . L E A A T N F I L L D<br/>         D E S S V M Q L A E M . . G F P L E . . A C R K A V Y F T G N M G A E V A F N W I I V<br/>         N Q C S I S O L I E M . . G F T Q N . . A S V R A L F N T G N Q D A E S A M N W L F Q<br/>         N S Q D V D N I G M . . G F T D S . . Q A K L A L K N T K G N . L E R A A D W L F S<br/>         D A K R I D I M V T M . . G F A R D . . E I N D A L V S Q K Y D . E V M A T Y I L L G<br/>         D E V S L T S M L S M . . G L N P N . . L C R K A L I L N N G D . V N R S V E W V F N<br/>         C D S K I Q R L R D M . . G I D E H . . E A R A V L S K E N W N . L E K A T E G L F S<br/>         F E E K V K Q L I D I . T G K N Q D . . E C V I A L H D C N G D . V N R A I N V L L E<br/>         T E K T F D R L L E M . . G F S Y N . . V T V A A I R A N G S N . L E M C L Q A L L H<br/>         D Q K R I D I M V P M . . G Y S Q E . . E I Q E S L S K M K Y D . - E I T A T Y L L L<br/>         E D E A I L R L E P M . . G F D R A . . L V L D V F F A C N K D . E Q L A A N Y L L D<br/>         L S S E I E R L M S Q . . G Y S Y Q . . D I Q K A L V I A H N N . I E M A K N I L R E<br/>         S Q E S I N Q L V Y M . . G F D T V . . V A E A A L R V F G G N . V Q L A A Q T L A H<br/>         Y T K K I E N L C A M . . G F D R N . . A V I V A L S S K S W D . V E T A T E L L L S<br/>         D P S K V H N L L Q L . . G F T A Q . . E A R L G L R A C D G N . V D H A A T H I S N<br/>         R N E T I E R I M E M . . G Y Q R E . . E V E R A L R A A F N N . P D R A V E Y L L M<br/>         P A T D I D R I L R A . . G F T L Q . . E A L G A L H R V G G N . A D L A L L V I L L A<br/>         L I E S L S O M L S M . . G F S D E G . G W L T R L L Q T K N Y D . I G A A L D T I Q Y<br/>         Y E T M L T E T M S M . . G Y E R E . . R V V A A L R A S Y N N . P H R A V E Y L L T<br/>         D E E I L Q E V I N M . . G F D R N . . H L I E S L R N R T Q N . D G T V T Y Y L I L<br/>         D P R T R E L M V S M . . G Y T R E . . E I Q D S L V G Q R G N . E V M A T Y L L L G<br/>         V R F V A G E L M L M . . G F C E N . . A C Y R A A Y S N N . V E T A S N W L M E<br/>         D E E I L Q O V S R M . . G L D R D . . Q L L D S L O K R I Q D . D A T V A Y Y L L Y<br/>         R I E K L I Q I F Q L . . G F N K A . . A I L E S V E K E K F E . D I H A T Y L L L G<br/>         L E E K V K R L V E M . . G F G D A . . Q V R S A I E S S G G D . E N L A L E K L C S<br/>         P E E I V A I T S M . . G F Q R N . . Q A I Q A L R A T N N N . L E R A L D W I F S<br/>         Y Q D N Q D M L I T M . . G F K S E . . E I D T A L R L S N N D . V E K A I Q Y L T R<br/>         Y A E Q L S O L N E M . . G F V D F . . E R N V Q A L R R S G G N . V Q G A I E S L L S<br/>         T R M I V E R L T E I . . G V S S D . . E A L L A L Q O N D M N . E N E A A G F L T R<br/>         Y A S Q L E Q O L S M . . G F S D R . . A R N V A A L T A T F G D . L N A A V E R L L N<br/>         Q E E N V L A T G M . . G Y D R E . . Q T I A A L R A A F N N . P D R A V E F L L N<br/>         V D A K I A K L M G E . . G Y A F E . . E V K R A L E I A Q N N . V E V A R S I L R E<br/>         D N Q A V K S L L E M . . G I P H E . . V A V D A L Q R T G G N . L E A A V N F I F S<br/>         P E Q T I Q L M D L . . G F P R D . . A V V K A L Q T N G N . A E F A A S L L F Q<br/>         Y S R Q L A E L K D M . . G F G D T . . N K N L D A L S S A H G N . I N R A I D Y L E K<br/>         Q K K V D S L I E M . . G F S R L . . E S I L A L G G S D W N . L A D A A E Q L L E<br/>         E L T A L E S L I E M . . G F P R G . . R A E K A L A L T G N Q G I E A A M D W L M E<br/>         L E A T I Q S I L E M G G G I W D R . . D I V L H A L S A A F N N . P E R A V E Y L Y S<br/>         R L E N V N T L R G M . . G Y S T Q . . A A K Q A L H Q A R G N . L D D A L K V L L S<br/>         Y E Q Q A A T L R E F . . G F E N D . . E L I Q L A L E Q A N G D . V Q A A M E F L I D<br/>         L D T K I K T L K N M . . G V S E S . . D A K D S L E R C G Y D . V E S A A E F I F S<br/>         N Q E V L D T L L S M . . D F P L V . . R C K K A L L A T G G K D A E L A M N W I F E<br/>         I N K S I H A M M A M . . G F S N E G . A W L T Q L L E S V Q G N . I S A A L D V M N V<br/>         L N S K I A Q L V S M . . G F D P L . . E A A Q A L D A A N G D . L D V A A S F L L -<br/>         E K E A I E R L K A L . . G F P E S . . L V I Q A Y F A C E K N . E N L A A N F L L S</p> | <p>CdiA-like/Rhs-like C-terminal toxin (CRCT)<br/>         EH domain-containing and endocytosis protein 1<br/>         Solution structure of tandem UBA of USP13<br/>         Ubiquitin carboxyl-terminal hydrolase 12<br/>         Ubiquitin carboxyl-terminal hydrolase A<br/>         Serine/threonine-protein kinase MARK1 isoform X1<br/>         Ubiquitin carboxyl-terminal hydrolase 12<br/>         AT12021p<br/>         Ubiquitin-associated protein 2-like<br/>         SeQueSTosome related<br/>         MAP/microtubule affinity-regulating kinase 3<br/>         osRAD23<br/>         E3 ubiquitin-protein ligase CBL<br/>         Solution structure of RSGI RUH-012<br/>         Ubiquitin-conjugating enzyme E2 K<br/>         Nub1 protein<br/>         UV excision repair protein RAD23<br/>         Regulatory solute carrier protein family 1 member 1<br/>         NMR structure of the UBA domain of p62 (SQSTM1)<br/>         Solution structure (Internal UBA Domain of HHR23A)<br/>         Serine/threonine protein kinases, catalytic domain<br/>         Serine/threonine-protein kinase MARK2 isoform X5<br/>         Ubiquitin specific protease 5 (Zn finger protein)<br/>         SNF1-related protein kinase<br/>         H39E23, serine/threonine Kinase<br/>         Ubiquitin-conjugating enzyme 27<br/>         Solution structure of tandem UBA of USP13<br/>         UBA domain-containing protein<br/>         Deubiquitination-protection protein dph1<br/>         UBA (putative ATP-dependent RNA helicase YLR419W)<br/>         Ubiquilin<br/>         UV excision repair protein RAD23<br/>         E3 ubiquitin-protein ligase CBL-B<br/>         Solution structure of UBA of RUP1p<br/>         DNA damage-inducible protein 1<br/>         GTS1 transcription factor (heat resistance and flocculation)<br/>         Ubiquitin Conjugating enzyme<br/>         UBA (UBX domain-containing protein 1 and similar proteins)<br/>         osRAD23<br/>         Nub1 protein<br/>         UBA domain-containing protein<br/>         UBA domain protein Ucp6<br/>         Deubiquitinating enzyme, peptidase C19 family<br/>         Ref(2) Pp protein<br/>         UBA domain protein Mud1<br/>         UV excision repair protein RAD23 homolog A</p> |
| <p>Consensus/60% .ppplpLbs M . . G F S p p . . p s b p A L p . s s s s . h p b A h p b L b p<br/>         * * ** ** *</p>                                                                                                                                                                                                                                                                                                                                                                                                                                                                                                                                                                                                                                                                                                                                                                                                                                                                                                                                                                                                                                                         |                                                                                                                                                                                                                                                                                                                                                                                                                                                                                                                                                                                                                                                                                                                                                                                                                                                                                                                                                                                                                                                                                                                                                                                                                                                                                                                                                                                                                                                                                                                                                                                                                                                                                                                                                                                                                                                                                                                                                                                                                                                                                                                                                                                                                                                                                                                                                                                                                                                                                                                                                                                                                                                                                                                                                                                                                                                                                                                                                                                                                                                                                                                                                                                                                                                                                                                                                                                                                                                                                                                                                                                                                                                                                                                                                                                                                                                                                                                                                                                                                                                                                                                                                                                                                                                                                                                                                                                                                                                                                                                                                                                                                                                                                                       |                                                                                                                                                                                                                                                                                                                                                                                                                                                                                                                                                                                                                                                                                                                                                                                                                                                                                                                                                                                                                                                                                                                                                                                                                                                                                                                                                                                                                                                                                                                                                                                                                                                                                                                                                                                                                                                                                                                                                                                                                                                                                                                                                                                                                                                                                                        |

|                                   |                                      |                                    |                                    |
|-----------------------------------|--------------------------------------|------------------------------------|------------------------------------|
| ■ <i>Saccharomyces cerevisiae</i> | ■ <i>Drosophila melanogaster</i>     | ■ <i>Mus musculus</i>              | ■ <i>Solanum tuberosum</i>         |
| ■ <i>Homo sapiens</i>             | ■ <i>Pseudonaja textilis</i>         | ■ <i>Bos taurus</i>                | ■ <i>Schizosaccharomyces pombe</i> |
| ■ <i>Dictyostelium discoideum</i> | ■ <i>Caenorhabditis elegans</i>      | ■ <i>Arabidopsis thaliana</i>      |                                    |
| ■ <i>Rattus rattus</i>            | ■ <i>Oryza sativa</i> Japonica Group | ■ <i>Piliocolobus tephrosceles</i> |                                    |
