# Supplementary material for: Cryptic Genes for Interbacterial Antagonism Distinguish Rickettsia Species Infecting Blacklegged Ticks From Other Rickettsia Pathogens
Source: PubMed Central journal article supplement (PMC9111745; doi:10.3389/fcimb.2022.880813), 2022-05-03
Supplement: DataSheet_12.pdf [file DataSheet_12.pdf]

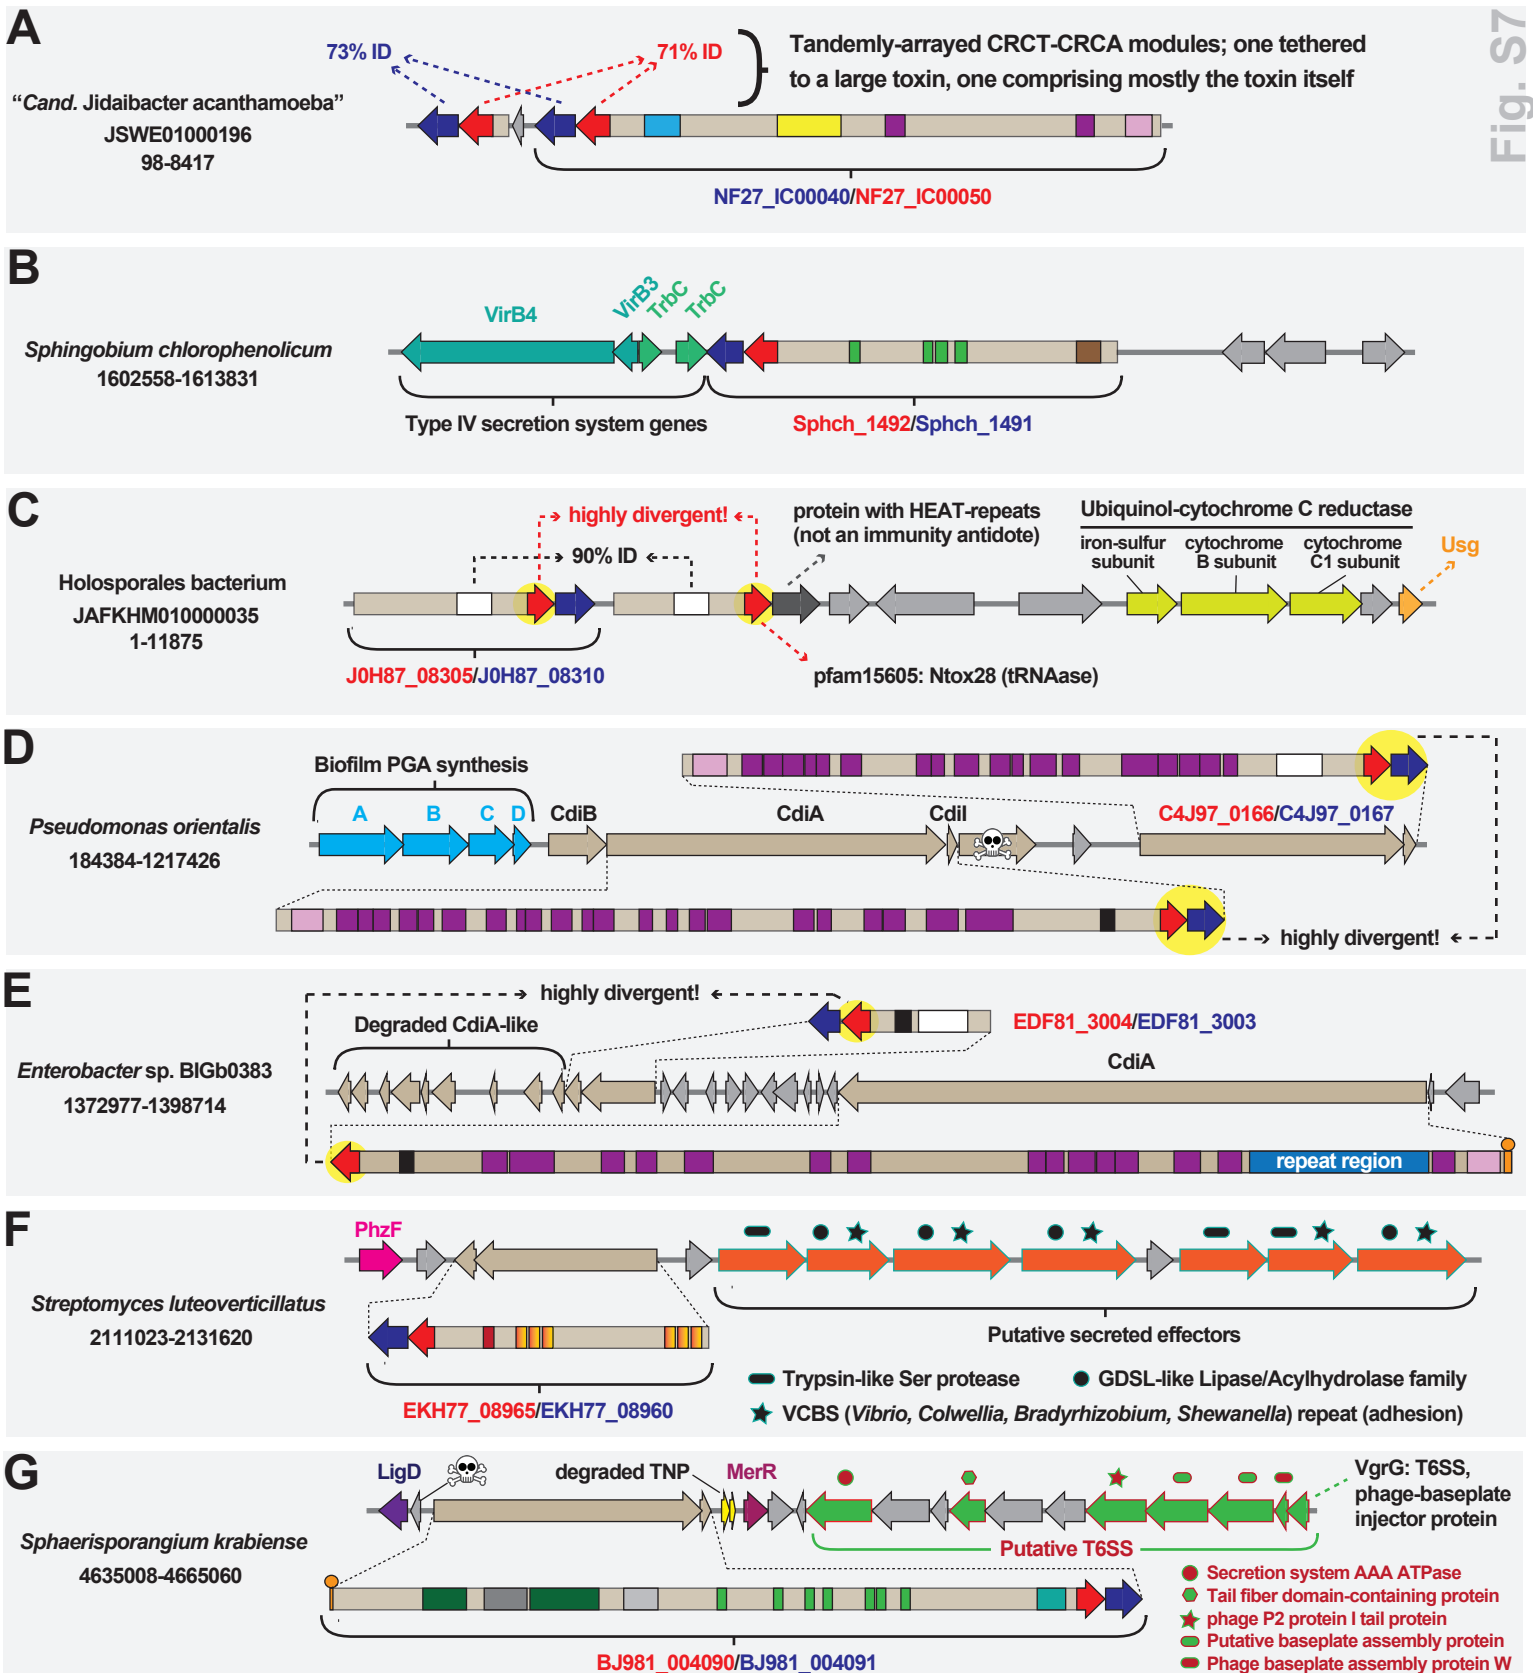

**H**

| Taxon (genome)                            | Subjects (with > 80% query coverage)     |
|-------------------------------------------|------------------------------------------|
| “ <i>Cand. Jidaibacter acanthamoeba</i> ” | --                                       |
| <i>Spingobium chlorophenicum</i>          | --                                       |
| Holosporales bacterium                    | --                                       |
| <i>Pseudomonas orientalis</i>             | C4J97_0161 (33 %ID)                      |
| <i>Enterobacter</i> sp. BIGb0383          | EDF81_4644 (60 %ID); EDF81_3716 (29 %ID) |
| <i>Streptomyces luteoverticillatus</i>    | --                                       |
| <i>Sphaerisorangium krabiense</i>         | --                                       |

**I**

| Taxon          | No.    | No. > 80% query cov.              |
|----------------|--------|-----------------------------------|
| Rickettsiales  | 16     | 10 (no <i>Rickettsia</i> species) |
| Actinobacteria | 12     | 2                                 |
| Cyanobacteria  | > 1000 | > 1000 (widespread)               |
| Chloroflexi    | 4      | 1                                 |
| Spirochaetes   | 12     | 5                                 |

Widespread in all proteobacterial classes and many other non-proteobacterial groups
